# Supplementary material for: Characterisation of the Putative Effector Interaction Site of the Regulatory HbpR Protein from Pseudomonas azelaica by Site-Directed Mutagenesis
Source: PubMed Central journal article supplement (PMC3040749; doi:10.1371/journal.pone.0016539), 2011-02-17
Supplement: pone.0016539.s001.pdf [file pone.0016539.s001.pdf]

## Supplementary Material to

### Characterisation of the putative effector interaction site of the regulatory HbpR protein from *Pseudomonas azelaica* by site-directed mutagenesis.

Christelle Vogne<sup>1</sup>, Hansi Bisht<sup>2</sup>, Sagrario Arias<sup>1</sup>, Sofia Fraile<sup>3</sup>, Rup Lal<sup>2</sup>, and Jan Roelof van der Meer<sup>1\*</sup>

<sup>1</sup>Department of Fundamental Microbiology, University of Lausanne, 1015 Lausanne, Switzerland, <sup>2</sup>Department of Zoology, University of Delhi, India, <sup>3</sup>National Centre for Biotechnology-CSIC, Madrid 28049, Spain.

\*Corresponding author:

J. R. van der Meer

Department of Fundamental Microbiology

University of Lausanne,

Bâtiment Biophore

Quartier UNIL-Sorge

1015 Lausanne, Switzerland

Tel. +41 21 692 5630

Fax.: +41 21 692 5605

Email: [janroelof.vandermeer@unil.ch](mailto:janroelof.vandermeer@unil.ch)

Table S1. Nucleotide sequence of the primers used, with the introduced mutations shown in lower case.

| Name      | Sequence                                             |
|-----------|------------------------------------------------------|
| S23F-For  | 5'- CTGCACTTTT <b>t</b> TCCCAACG -3'                 |
| V41F-For  | 5' -CCTACA <b>A</b> tTgAGACACT G -3'                 |
| E42F-For  | 5' -CTGCTCCTACAAGTG <b>ttt</b> ACACTGAAGGATATAT -3'  |
| T43F-For  | 5' -CCTACAAGTGGAG <b>ttt</b> CTGAAGGATATATAC -3'     |
| I47T-For  | 5'- ACACTGAAGGATA <b>cc</b> TACAAGGAA -3'            |
| L51N-For  | 5'- ATATACAAGGAA <b>aacc</b> CAGGCCTATTCT -3'        |
| K169F-For | 5'- GCATGCGCTGGAT <b>ttt</b> CCCATTGTCGTG G -3'      |
| I171F-For | 5'- GAAAACCC <b>t</b> TTGTTCGTGG -3'                 |
| I171T-For | 5'- TCGCTGGAAAACCC <b>acc</b> GTTCG -3'              |
| V172F-For | 5'- GGAAAACCCATT <b>ttt</b> GTGGAAGAGATC G -3'       |
| V172T-For | 5'- GAAAACCCATT <b>acc</b> CGTGGAAAGAG -3'           |
| V173T-For | 5'- AACCCATTGTC <b>acc</b> GAAGAGATCGA -3'           |
| E174F-For | 5'- AAAACCCATTGTCGT <b>ttt</b> GAGATCGAATGCCAAG -3'  |
| E174Q-For | 5'- CCATTGTCGTG <b>c</b> AAGAGATCGAATG -3'           |
| E175F-For | 5'- CGTGGA <b>ttt</b> ATCGAATG -3'                   |
| E175L-For | 5'- CCATTGTCGTGGAA <b>ctc</b> ATCGAATGC -3'          |
| I176T-For | 5'- TCGTGGAAAGAG <b>ac</b> CGAATGCCAAG -3'           |
| C178F-For | 5'- GGAAGAGATCGAAT <b>tt</b> CAAGCGATGGGAC -3'       |
| Q179E-For | 5'- ATCGAATGC <b>gag</b> GCGATGGGAC -3'              |
| A193S-For | 5'- TCAAGCGAAGCCC <b>ag</b> CGAAATGTGG -3'           |
| E194L-For | 5'- AAGCCCGCC <b>ctc</b> ATGTGGGCGCTC -3'            |
| E194P-For | 5'- CAAGCGAAGCCCGCC <b>ccc</b> ATGTGG -3'            |
| E194Q-For | 5'- AAGCCCGCC <b>c</b> AAATGTGGGCG -3'               |
| W196H-For | 5'- GCCGAAATG <b>ccac</b> GCGCTCAGTCAG -3'           |
| L198F-For | 5'- CGCCGAAATGTGGGCG <b>tT</b> tAGTCAGTCGGAGCAAT -3' |
| Q200L-For | 5'- GCGCTCAGT <b>ttt</b> TCGGAG -3'                  |
| Q200F-For | 5'- GGCGCTCAGT <b>tc</b> TCGGAGCAA -3'               |

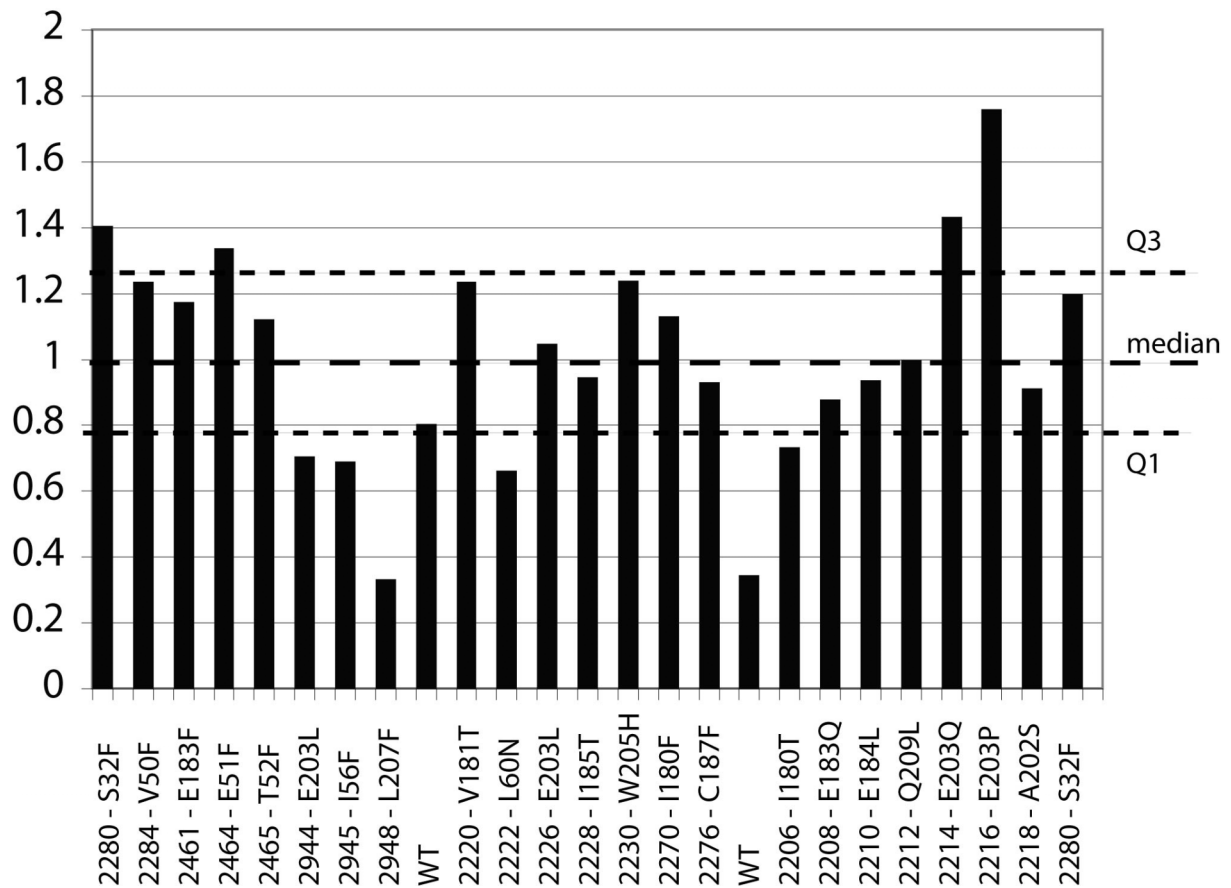

**Fig. S1.** Normalized band intensities of HbpR proteins expressed from the  $P_{R-}$  promoter in *E. coli* as detected by the anti-HbpR M13- $V_{HH}$  phage antibody. Protein band intensities on Western (Fig. 4) were normalized for film exposure differences and for the total amount of protein loaded, and then averaged over both HbpR bands. This average intensity is plotted in the graph, with the calculated median, the 25% quantile (Q1) and the 75% quantile (Q3) over all cultures. HbpR expression in strains 2948 (L207F), 2216 (E203P) and one of the wild-type are considered outliers in the box plot calculation.

|                                |                                                      |                        |
|--------------------------------|------------------------------------------------------|------------------------|
| gi   455334   gb   AAB59162.1  | -----MSLTYKPKMQHEDMQDLSSQIRFVAAEGKIWLGEQRMLVMQL      | 42                     |
| gi   483552   emb   CAA48174.1 | -----MPIKYKPEIQHSDFKDLTNLIHFQSMEGKIWLGEQRMLLLQF      | 42                     |
|                                |                                                      | L                      |
| gi   2098614   gb   AAB57638.1 | MKSNKNNSDDRSIVADLALPEVHALVSKLHFSPNEGRIWLDESRCLLLQV   | 50                     |
| gi   1633081   pdb   1VID      | -----MGDTKEQRILRYVQQNAKPGDPQSVLEAIDTYCTQKEWAMNV      | 42                     |
|                                |                                                      |                        |
| gi   455334   gb   AAB59162.1  | STLASFRREIISLIGVERAKGFFLRRLGYQSGLMDAELARKLRPAMREEEV  | 92                     |
|                                |                                                      | L S                    |
| gi   483552   emb   CAA48174.1 | SAMASFRREMVNTLGIERAKGLFLRHGYQSGLKDAELARKLRPNASEVGM   | 92                     |
|                                |                                                      | D P ?                  |
| gi   2098614   gb   AAB57638.1 | ETLKDIYKELQAYSGPDYTRFLTRIGFTTGQRDAEMI IKKQGISSIKEQ   | 100                    |
| gi   1633081   pdb   1VID      | G---DAKGQIMDAVIREYSPSLVLELGAYCGYSAVRMARLLQPGARLLTM   | 89                     |
|                                |                                                      |                        |
| gi   455334   gb   AAB59162.1  | FLAGPQLYALKGMVKVRL-----TMDIAIRDGRFNVEAEWIDSFEVDICR   | 138                    |
|                                |                                                      | A E/N/Q                |
| gi   483552   emb   CAA48174.1 | FLAGPQMHSCLKGLVKVRPT-----ELDIDKEYGRFYAEMEWIDSFEVEICQ | 138                    |
|                                |                                                      | L C V N L P LK A/D/K/R |
| gi   2098614   gb   AAB57638.1 | IYAGGVLHALQGFLTSIQAGSSALNAVDMKSM DYHAEAYWQNSIEAEIHL  | 150                    |
| gi   1633081   pdb   1VID      | EMNPDYAAITQQMLNFAGLQ---DKVTILNGASQDLIPQLKKKYDVDTL    | 136                    |
|                                |                                                      |                        |
| gi   455334   gb   AAB59162.1  | TELGLMNEPVCWTVLGYASGYGSFAFMGRRIIFQETSCRGCDDKCLIVGK   | 188                    |
|                                |                                                      | K I                    |
| gi   483552   emb   CAA48174.1 | TDLGQMOPVCWTVLLGYACAYSSAFMGREIIFKEVSCRGCDDKCRVIGK    | 188                    |
|                                |                                                      | K ? W E                |
| gi   2098614   gb   AAB57638.1 | AMHGVSSHAVCWFSVAYCSGYLSACAGKPIVVEEIECQAMGHTHCRIQAK   | 200                    |
| gi   1633081   pdb   1VID      | MVFLDHWKDRYLPDTLLLEKCGLLRKGTVLLADNVIVPGTPDFLAYVRGS   | 186                    |
|                                |                                                      |                        |
| gi   455334   gb   AAB59162.1  | TAEWGDVSSFEAYFKSDPIVD-----                           | 210                    |
| gi   483552   emb   CAA48174.1 | PAEWDVDFVAFKQYFKNDPIIE-----                          | 210                    |
|                                |                                                      | R                      |
| gi   2098614   gb   AAB57638.1 | PAEMWALSQS-----                                      | 210                    |
| gi   1633081   pdb   1VID      | SSFECTHYSSYLEYMKVVDGLEKAIYQGPSSPDKS                  | 221                    |

**Fig. S2.** CLUSTAL 2.0.10 multiple sequence alignment of XylR (AAB59162), DmpR (CAA48174) and HbpR (AAB57638) A-domains compared to the catechol O-methylase (1VID). Major residual mutations in XylR and DmpR are indicated below the corresponding amino acid. For an HbpR A-domain mutation compilation, see Fig. S2. Mutants and mutant effects described in: [1] [2] [3] [4] [5] [6] [7] [8].

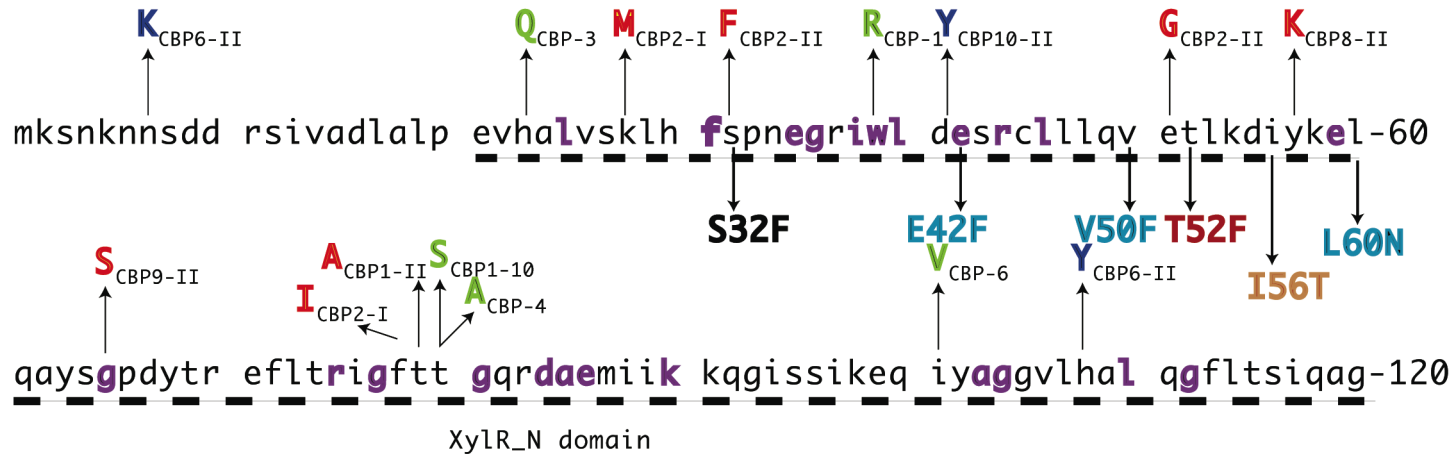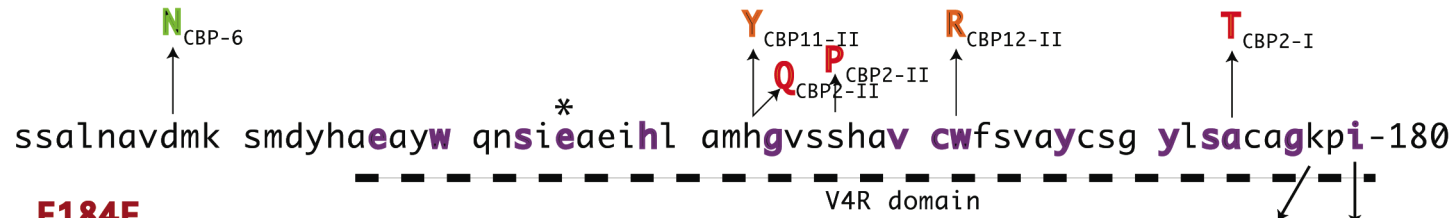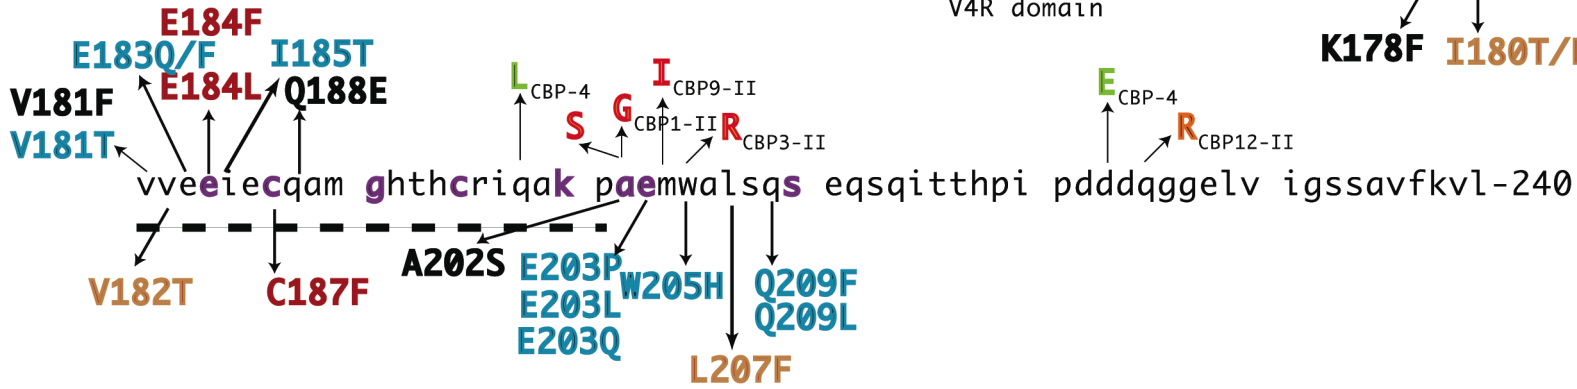

**Fig. S3.** Primary sequence of the HbpR A-domain and the position and changes of site-directed and randomly selected mutations. Residues in pink are identical to those in aligned XylR and DmpR A-domains. Dotted lines below the primary sequence point to the two predicted conserved XylR\_N and V4R domains. Residues indicated as e.g., S32F, are those produced in this study, with red labeled residues abolishing 2-HBP induction, orange diminishing induction, blue having no major effect, and black demonstrating higher background expression in absence of 2-HBP, as compared to wild-type. Residues labeled e.g., S<sub>CBP9-II</sub>, point to those recovered from directed evolution experiments in a previous study [9], with green meaning gain of induction potential with 2-chlorobiphenyl, blue indicating gain of function with elevated background; orange, elevated background but no gain of function nor loss of 2-HBP inducibility; and red, loss of inducibility but semi-constitutive phenotype.

## References

1. Sarand I, Skarfstad E, Forsman M, Romantschuk M, Shingler V (2001) Role of the DmpR-mediated regulatory circuit in bacterial biodegradation properties in methylphenol-amended soils. *Appl Environ Microbiol* 67: 162-171.
2. Galvao TC, Mencia M, de Lorenzo V (2007) Emergence of novel functions in transcriptional regulators by regression to stem protein types. *Mol Microbiol* 65: 907-919.
3. Garmendia J, Devos D, Valencia A, de Lorenzo V (2001) A la carte transcriptional regulators: unlocking responses of the prokaryotic enhancer-binding protein XylR to non-natural effectors. *Mol Microbiol* 42: 47-59.
4. Shingler V, Pavel H (1995) Direct regulation of the ATPase activity of the transcriptional activator DmpR by aromatic compounds. *Mol Microbiol* 17: 505-513.
5. Delgado A, J.-L. R (1994) Genetic evidence for activation of the positive transcriptional regulator XylR, a member of the NtrC family of regulators, by effector binding. *J Biol Chem* 269: 8059-8062.
6. Salto R, Delgado A, Michan C, Marques S, Ramos JL (1998) Modulation of the function of the signal receptor domain of XylR, a member of a family of prokaryotic enhancer-like positive regulators. *J Bacteriol* 180: 600-604.
7. Skarfstad E, O'Neill E, Garmendia J, Shingler V (2000) Identification of an effector specificity subregion within the aromatic-responsive regulators DmpR and XylR by DNA shuffling. *J Bacteriol* 182: 3008-3016.
8. Pavel H, Forsman M, Shingler V (1994) An aromatic effector specificity mutant of the transcriptional regulator DmpR overcomes the growth constraints of *Pseudomonas* sp. strain CF600 on para-substituted methylphenols. *J Bacteriol* 176: 7550-7557.



9. Beggah S, Vogne C, Zenaro E, van der Meer JR (2008) Mutant transcription activator isolation via green fluorescent protein based flow cytometry and cell sorting. *Microb Biotechnol* 1: 68-78.
